# Supplementary material for: Acetyl-CoA Carboxylase (ACC) Inhibitor, CP640186, Effectively Inhibited Dengue Virus (DENV) Infection via Regulating ACC Phosphorylation
Source: MDPI journal article supplement (doi:10.3390/molecules27238583), 2022-12-05
Supplement: s1 [file s1]

## Supplemental Figures

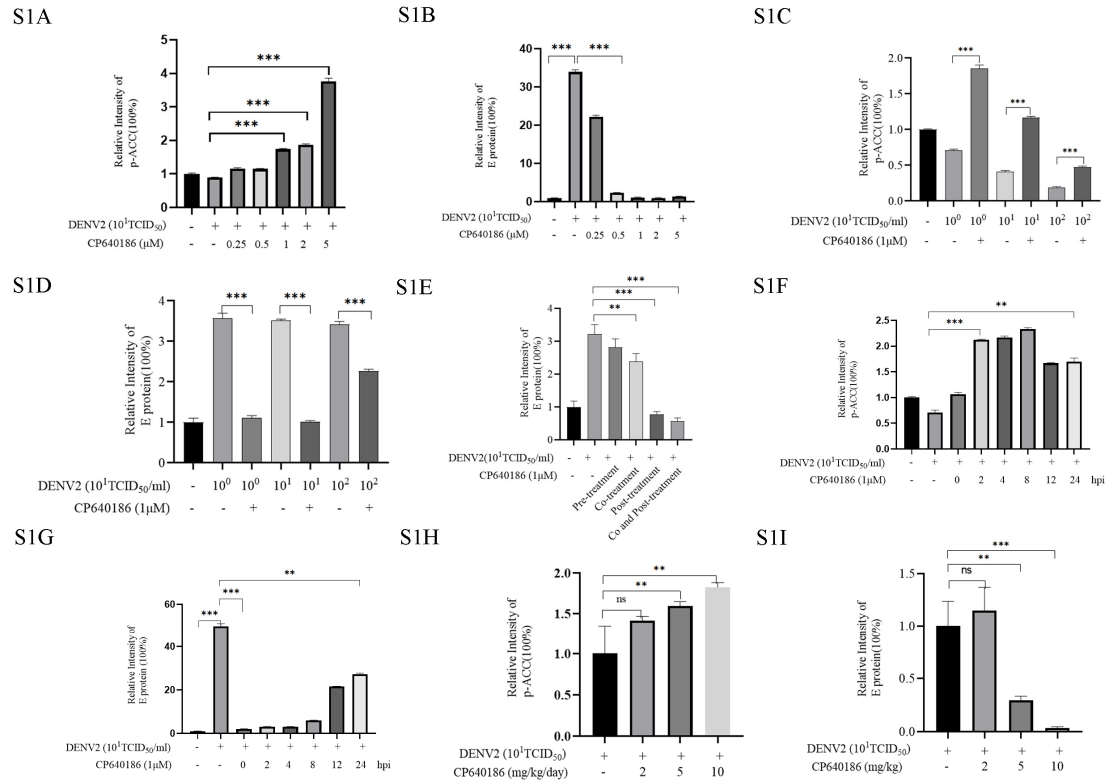

**Figure S1.** The quantification of western blotting results. (A,B) The quantification of the P-ACC and E protein level in Figure 2A. (C,D) The quantification of the P-ACC and E protein level in Figure 3A. (E) The quantification of E protein level in Figure 4B. (F,G) The quantification of the P-ACC and E protein level in Figure 4F. (H,I) The quantification of the P-ACC and E protein level in Figure 5E. \*\* indicates  $p < 0.01$ . \*\*\* indicates  $p < 0.001$ .

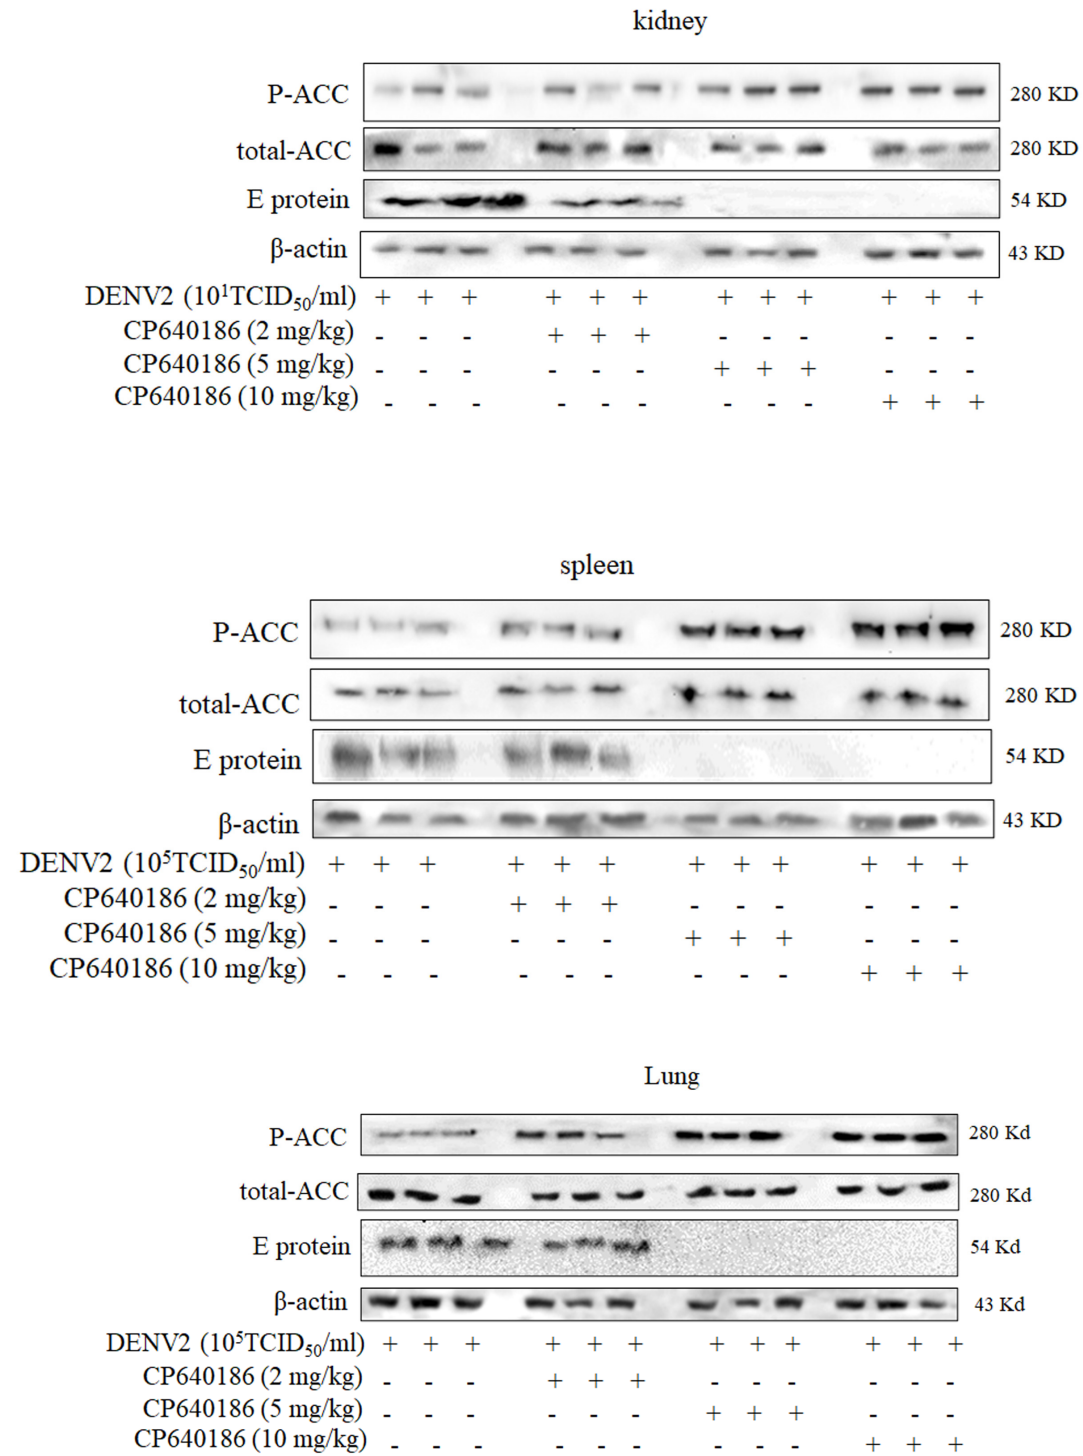

**Figure S2.** The western blotting results in mice tissues.
